# Supplementary material for: Fluid Responsiveness Is Associated with Successful Weaning after Liver Transplant Surgery
Source: MDPI journal article supplement (doi:10.3390/jpm14040429), 2024-04-18
Supplement: s1 [file s1]

**Table S1. A.** Multiple linear regression analysis table showing coefficients examining the influence of some clinically relevant variables on time to spontaneous breathing trial (SBT). **B.** Multiple linear regression analysis table showing coefficients examining the influence of some clinically relevant variables on time to extubation.

**A**

|                               | Unstandardized<br>Coefficients | Standardized<br>Coefficients |                   |       |        | 95% confidence interval<br>for B |                |
|-------------------------------|--------------------------------|------------------------------|-------------------|-------|--------|----------------------------------|----------------|
| Model                         | B                              | Beta                         | Standard<br>error | t     | p      | lower<br>bound                   | upper<br>bound |
| (Constant)                    | 107.82                         |                              | 62.67             | 1.72  | 0.119  | -33.94                           | 249.59         |
| FR_state1 fluid<br>responsive | -67.9                          | -0.77                        | 21.38             | -3.18 | 0.011* | -116.27                          | -19.53         |
| MELD                          | -0.05                          | -0.01                        | 1.48              | -0.04 | 0.972  | -3.4                             | 3.29           |
| FB_postop                     | 0                              | 0.06                         | 0                 | 0.29  | 0.781  | -0.01                            | 0.01           |
| CI                            | -43.94                         | -0.78                        | 14.76             | -2.98 | 0.016* | -77.34                           | -10.55         |

\* Statistically significant

*FR\_state fluid responsive* positive fluid responsiveness state at T1, *MELD* model for end-stage liver disease, *FB\_postop* postoperative fluid balance, *CI* cardiac index.

The regression model showed that the overall fit was statistically significant ( $p = 0.026$ ). Being fluid responsive and having a higher cardiac index are significantly associated with a shorter time to SBT this sample of liver transplant patients with high perioperative fluid balance.

**B**

|                                  | Unstandardized<br>Coefficients | Standardized<br>Coefficients |                   |       |        | 95% confidence<br>interval for B |                |
|----------------------------------|--------------------------------|------------------------------|-------------------|-------|--------|----------------------------------|----------------|
| Model                            | B                              | Beta                         | Standard<br>error | t     | p      | lower<br>bound                   | upper<br>bound |
| (Constant)                       | 107.06                         |                              | 64.3              | 1.66  | 0.130  | -38.39                           | 252.51         |
| FR_state2<br>fluid<br>responsive | -69.22                         | -0.8                         | 21.94             | -3.16 | 0.012* | -118.85                          | -19.59         |
| MELD                             | 0.18                           | 0.03                         | 1.52              | 0.12  | 0.909  | -3.25                            | 3.61           |
| FB_postop                        | 0                              | 0.06                         | 0                 | 0.28  | 0.788  | -0.01                            | 0.01           |
| CI                               | -41.22                         | -0.74                        | 15.15             | -2.72 | 0.024* | -75.49                           | -6.96          |

\* Statistically significant

*FR\_state2* fluid responsive positive fluid responsiveness state at T2, *MELD* model for end-stage liver disease, *FB\_postop* postoperative fluid balance, *CI* cardiac index.

The regression model showed that the overall fit was statistically significant ( $p = 0.041$ ). Being fluid responsive and having a higher cardiac index are significantly associated with a shorter time to extubation in this sample of liver transplant patients with high perioperative fluid balance.
